# Supplementary material for: Mypt1-mediated spatial positioning of Bmp2-producing cells is essential for liver organogenesis
Source: Oxford University Press journal article supplement (doi:10.1242/dev.024406), 2008-09-05
Supplement: dev024406-sup-024406-figs2.pdf [file dev024406-sup-024406-figs2.pdf]

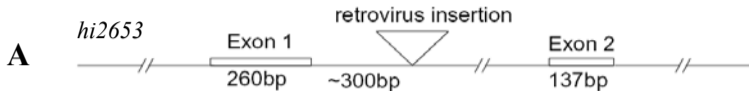

**B**

TCAGCCAGCCCATCCTGCTGGAGCTGGAGGCGCCACTTAAAA  
TCTGTGGTaggttagattctctccttctccagaggagaatctctgccttttaattacattcctttctct  
ctatctcaaggttttgaaatctgcgtaagtagagcaggtataataataatgtaatgaggataggttg  
aggtcatttctcttctctctgtggcacacctgagacctctctctctctctctctctgtttgtctttgtgtgtg  
gtgcgcgcgccagagtcattaactgaatcttgggtgtcgaggtcttaggccttaggtcttttttatatt  
attatattctaactaatccatgttggtttattgatttatgatgattactctctctttctaGGTGACATCC  
ATGGGCAGTACACAGATCTGTTGAGGTTGTTTGAATATGG
