# Supplementary material for: Mypt1-mediated spatial positioning of Bmp2-producing cells is essential for liver organogenesis
Source: Oxford University Press journal article supplement (doi:10.1242/dev.024406), 2008-09-05
Supplement: dev024406-tables1.pdf [file dev024406-tables1.pdf]

**Table S1. Summary of rescue of liver phenotype in *mypt1<sup>sq181</sup>* by Bmp, Wnt2bb, Fgf or RA signaling molecules**

| Signaling molecules                                  | Rescued number/total number of mutant embryos examined |
|------------------------------------------------------|--------------------------------------------------------|
| <i>wnt2bb</i> mRNA (100 ng/ $\mu$ l) injection       | 0/18                                                   |
| <i>bmp2a</i> mRNA (1 ng/ $\mu$ l) injection          | 42/93                                                  |
| <i>psox17-bmp2a</i> plasmid injection (ng/ $\mu$ l): |                                                        |
| 5                                                    | 0/14                                                   |
| 10                                                   | 10/26                                                  |
| 20                                                   | 7/14                                                   |
| <i>psox17-fgf8</i> plasmid injection (ng/ $\mu$ l):  |                                                        |
| 5                                                    | 0/9                                                    |
| 10                                                   | 0/14                                                   |
| RA incubation:                                       |                                                        |
| $10^{-8}$ M                                          | 0/28                                                   |
| $10^{-7}$ M                                          | 0/17                                                   |
