# Supplementary figures and images for: Mypt1-mediated spatial positioning of Bmp2-producing cells is essential for liver organogenesis
Source: Oxford University Press journal article supplement (doi:10.1242/dev.024406), 2008-09-05

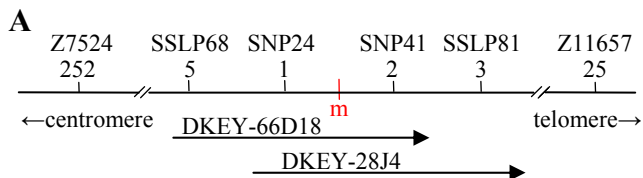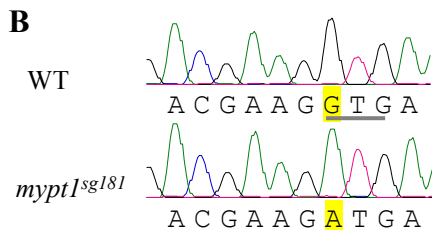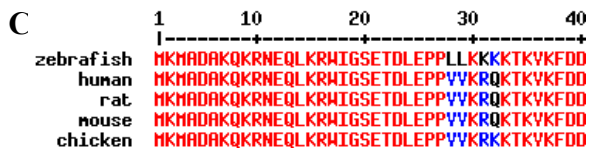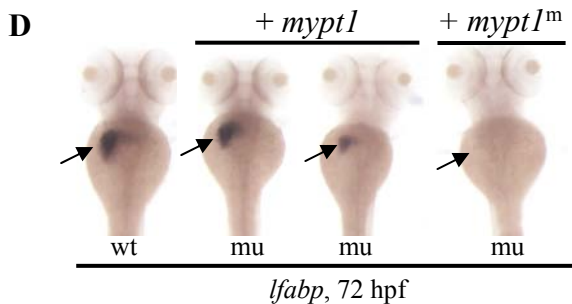

Supplement: dev024406-sup-024406-figs1.pdf [file dev024406-sup-024406-figs1.pdf]

**A****wt**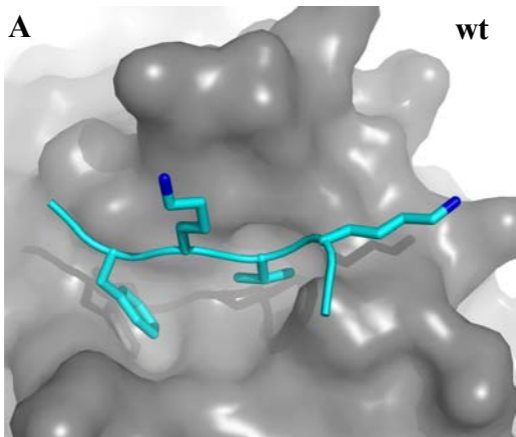**B****mu**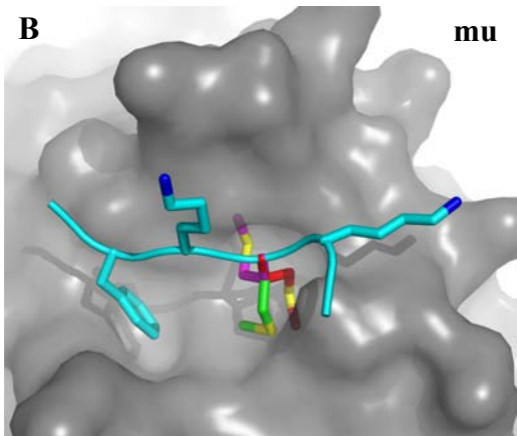

Supplement: dev024406-sup-024406-figs3.pdf [file dev024406-sup-024406-figs3.pdf]

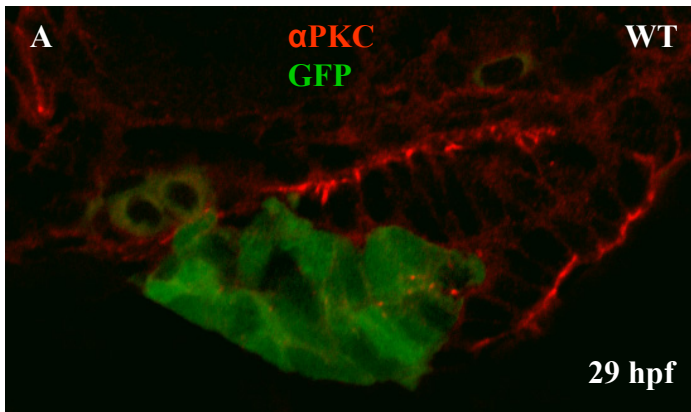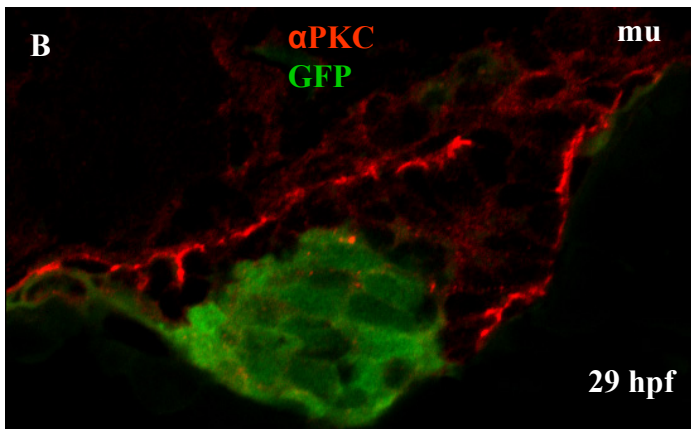

Supplement: dev024406-sup-024406-figs4.pdf [file dev024406-sup-024406-figs4.pdf]
